# Supplementary material for: Whole transcriptome analysis of human erythropoietic cells during ontogenesis suggests a role of VEGFA gene as modulator of fetal hemoglobin and pharmacogenomic biomarker of treatment response to hydroxyurea in β-type hemoglobinopathy patients
Source: PubMed Central journal article supplement (PMC5654038; doi:10.1186/s40246-017-0120-8), 2017-10-23

## Supplementary Information

# **Whole transcriptome analysis of human erythropoietic cells during ontogenesis suggests a role of *VEGFA* gene as modulator of fetal hemoglobin and pharmacogenomic biomarker of treatment response to hydroxyurea in $\beta$ -type hemoglobinopathies patients**

Vasiliki Chondrou <sup>1</sup>, Petros Kolovos <sup>2</sup>, Argyro Sgourou <sup>3</sup>, Alexandra Kourakli <sup>4</sup>, Alexia Pavlidaki <sup>1,%</sup>, Vlasia Kastrinou <sup>1</sup>, Anne John <sup>5</sup>, Argiris Symeonidis <sup>4</sup>, Bassam R Ali <sup>5,6</sup>, Adamantia Papachatzopoulou <sup>7</sup>, Theodora Katsila <sup>1</sup>, George P Patrinos <sup>1,5,6,\*</sup>

<sup>1</sup> Department of Pharmacy, School of Health Sciences, University of Patras, Patras, Greece;

<sup>2</sup> Biotech Research and Innovation Centre (BRIC), University of Copenhagen, Copenhagen, Denmark;

<sup>3</sup> Hellenic Open University, Patras, Greece;

<sup>4</sup> Hematology Division, Department of Internal Medicine, Faculty of Medicine, University of Patras, Patras, Greece;

<sup>5</sup> Department of Pathology, College of Medicine & Health Sciences, United Arab Emirates University, Al-Ain, United Arab Emirates;

<sup>6</sup> Zayed Bin Sultan Center for Health Sciences, United Arab Emirates University, Al-Ain, United Arab Emirates;

<sup>7</sup> Laboratory of General Biology, Faculty of Medicine, University of Patras, Patras, Greece;

<sup>%</sup> Present address: Institut de Génétique et de Biologie Moléculaire et Cellulaire,

IGBMC/CNRS/INSERM/UDS, BP 10142, 67404 ILLKIRCH, CU de Strasbourg, France

**Supplementary Table 1:** Up-regulated genes when (i) peripheral blood is compared to umbilical cord blood and fetal liver (PB vs CB+FL) and (ii) peripheral blood is compared to fetal liver (PB vs FL).

|    | Gene                                                                                                                          | Fold change |             |
|----|-------------------------------------------------------------------------------------------------------------------------------|-------------|-------------|
|    |                                                                                                                               | PB vs CB+FL | PB vs FL    |
| 1  | Abhydrolase domain containing 5 ( <i>ABHD5</i> )                                                                              | 2.622492275 | 3.158577955 |
| 2  | Acyl-CoA synthetase long-chain family member 1 ( <i>ACSL1</i> )                                                               | 2.695445368 | 3.886746772 |
| 3  | Adult retina protein ( <i>LOC153222</i> )                                                                                     | 3.836479082 | 3.802381808 |
| 4  | Alanyl (membrane) aminopeptidase (aminopeptidase N, aminopeptidase M, microsomal aminopeptidase, CD13, p150) ( <i>ANPEP</i> ) | 3.725120556 | 4.851373155 |
| 5  | Aquaporin 1 (Colton blood group) ( <i>AQP1</i> )                                                                              | 3.212601639 | 5.279028938 |
| 6  | Aquaporin 3 (Gill blood group) ( <i>AQP3</i> )                                                                                | 2.450076347 | 2.988984175 |
| 7  | Arginase, type II ( <i>ARG2</i> )                                                                                             | 3.613212815 | 5.423182578 |
| 8  | Argininosuccinate synthetase 1 ( <i>ASS1</i> )                                                                                | 4.525992699 | 5.419764228 |
| 9  | Brain expressed X-linked 2 ( <i>BEX2</i> )                                                                                    | 6.945779433 | 9.37818746  |
| 10 | Calbindin 1, 28kDa ( <i>CALB1</i> )                                                                                           | 5.400211051 | 7.3433928   |
| 11 | Caprin family member 2 ( <i>CAPRIN2</i> )                                                                                     | 2.410228563 | 7.299756216 |
| 12 | Carbonic anhydrase I ( <i>CA1</i> )                                                                                           | 3.620053317 | 17.59825156 |
| 13 | Carbonic anhydrase III, muscle specific ( <i>CA3</i> )                                                                        | 6.832627049 | 10.97637993 |
| 14 | CDNA clone IMAGE:2960540 ( <i>IMAGE:2960540</i> )                                                                             | 3.157218537 | 3.637971722 |
| 15 | CDNA clone IMAGE:4077090 ( <i>IMAGE:4077090</i> )                                                                             | 3.501281265 | 4.085316904 |
| 16 | CDNA FLJ13598 fis, clone PLACE1009921 ( <i>FLJ13598 fis, clone PLACE1009921</i> )                                             | 4.384485484 | 8.48619052  |
| 17 | CDNA FLJ38294 fis, clone FCBBF3010211 ( <i>FCBBF3010211</i> )                                                                 | 3.705148914 | 3.576944373 |
| 18 | CDNA FLJ39164 fis, clone OCBBF2002656 ( <i>FLJ39164 fis, clone OCBBF2002656</i> )                                             | 4.082209084 | 5.334814127 |
| 19 | Cerebellar degeneration-related protein 2, 62kDa ( <i>CDR2</i> )                                                              | 3.023791176 | 3.504359915 |
| 20 | Chemokine (C-C motif) receptor-like 2 /// similar to chemokine (C-C motif) receptor-like 2 ( <i>CCRL2</i> )                   | 2.797503169 | 3.05214658  |
| 21 | Chloride intracellular channel 2 ( <i>CLIC2</i> )                                                                             | 3.708613174 | 7.807914676 |
| 22 | Chromobox homolog 4 (Pc class homolog, Drosophila) ( <i>CBX4</i> )                                                            | 2.412019839 | 3.330428652 |
| 23 | Chromosome 16 open reading frame 45 ( <i>c16orf45</i> )                                                                       | 3.094423866 | 3.641006517 |

|    | Gene                                                                                          | Fold change |             |
|----|-----------------------------------------------------------------------------------------------|-------------|-------------|
|    |                                                                                               | PB vs CB+FL | PB vs FL    |
| 24 | Chromosome 18 open reading frame 54 ( <i>c18orf54</i> )                                       | 2.698998863 | 2.900329498 |
| 25 | Chromosome 6 open reading frame 85 ( <i>c6orf85</i> )                                         | 2.833636218 | 4.116658639 |
| 26 | Collagen, type XV, alpha 1 ( <i>COL15A1</i> )                                                 | 3.360363394 | 5.631413627 |
| 27 | C-type lectin domain family 2, member B ( <i>CLEC2B</i> )                                     | 4.780749708 | 5.134772508 |
| 28 | Cyclin E2 ( <i>CCNE2</i> )                                                                    | 2.630337519 | 3.563666808 |
| 29 | Cyclin G2 ( <i>CCNG2</i> )                                                                    | 4.310290094 | 5.003342199 |
| 30 | Cytoplasmic polyadenylation element binding protein 4 ( <i>CPEB4</i> )                        | 3.220709299 | 2.997618179 |
| 31 | Death-associated protein kinase 1 ( <i>DAPK1</i> )                                            | 3.418453562 | 4.562000202 |
| 32 | Erythrocyte membrane protein band 4.1 like 4A ( <i>EPB41L4A</i> )                             | 3.044804445 | 3.031319356 |
| 33 | Eukaryotic translation initiation factor 4B ( <i>EIF4B</i> )                                  | 2.477766535 | 2.331434714 |
| 34 | Family with sequence similarity 129, member A ( <i>FAM129A</i> )                              | 3.938814688 | 5.929304871 |
| 35 | Family with sequence similarity 19 (chemokine (C-C motif)-like), member A2 ( <i>FAM19A2</i> ) | 3.007321258 | 5.021566613 |
| 36 | FLJ41603 protein ( <i>FLJ41603 protein</i> )                                                  | 3.047502752 | 5.439389845 |
| 37 | Forkhead box O1 ( <i>FOXO1</i> )                                                              | 5.544990988 | 4.820842258 |
| 38 | Forkhead box O3 ( <i>FOXO3</i> )                                                              | 3.298149808 | 3.940756072 |
| 39 | Full length insert cDNA clone ZE01A04 ( <i>ZE01A04</i> )                                      | 3.546099103 | 9.296870957 |
| 40 | Glutamine-fructose-6-phosphate transaminase 1 ( <i>GFPT1</i> )                                | 2.79883562  | 3.347817348 |
| 41 | Glutamyl-prolyl-tRNA synthetase ( <i>EPRS</i> )                                               | 2.460069419 | 2.759411242 |
| 42 | Grainyhead-like 1 (Drosophila) ( <i>GRHL1</i> )                                               | 5.199061764 | 6.846860186 |
| 43 | GRB2-associated binding protein 2 ( <i>GAB2</i> )                                             | 3.776169216 | 3.652174464 |
| 44 | Growth differentiation factor 15 ( <i>GDF15</i> )                                             | 3.39635034  | 7.552139574 |
| 45 | GTP cyclohydrolase 1 (dopa-responsive dystonia) ( <i>GCH1</i> )                               | 4.809902234 | 10.7000921  |
| 46 | Guanine nucleotide binding protein (G protein), alpha 13( <i>GNA13</i> )                      | 3.238156457 | 5.142374595 |
| 47 | Headcase homolog (Drosophila) ( <i>HECA</i> )                                                 | 2.836070928 | 3.181720263 |
| 48 | Hemoglobin, delta ( <i>HBD</i> )                                                              | 2.939071082 | 6.742514671 |
| 49 | Homeodomain interacting protein kinase 2 ( <i>HIPK2</i> )                                     | 2.80259823  | 3.184614641 |
| 50 | Hypothetical protein FLJ20309 ( <i>FLJ20309</i> )                                             | 3.848681707 | 5.224824329 |
| 51 | Hypothetical protein LOC728177 ( <i>LOC728177</i> )                                           | 3.838535738 | 5.726743805 |
| 52 | Hypothetical protein MGC14376 ( <i>MGC14376</i> )                                             | 3.458267787 | 5.718472644 |

|    | Gene                                                                                                   | Fold change |             |
|----|--------------------------------------------------------------------------------------------------------|-------------|-------------|
|    |                                                                                                        | PB vs CB+FL | PB vs FL    |
| 53 | Insulin receptor substrate 2 ( <i>IRS2</i> )                                                           | 2.761324541 | 3.292273215 |
| 54 | Interleukin 6 signal transducer (gp130, oncostatin M receptor) ( <i>IL6ST</i> )                        | 3.287644588 | 2.897845459 |
| 55 | Interleukin 8 ( <i>IL8</i> )                                                                           | 6.746065908 | 10.40248731 |
| 56 | JAZF zinc finger 1 ( <i>JAZF1</i> )                                                                    | 2.704674137 | 5.563255842 |
| 57 | Jumonji C domain-containing histone demethylase 1 homolog D ( <i>S. cerevisiae</i> ) ( <i>JHDM1D</i> ) | 2.868499777 | 3.284062335 |
| 58 | Kelch domain containing 8A ( <i>KLHDC8A</i> )                                                          | 3.503081802 | 5.791548778 |
| 59 | KIAA0746 protein ( <i>KIAA0746</i> )                                                                   | 2.682592129 | 2.886614058 |
| 60 | KIAA0774 ( <i>KIAA0774</i> )                                                                           | 2.874881968 | 5.351106442 |
| 61 | KIAA1727 protein ( <i>KIAA1727</i> )                                                                   | 2.759577804 | 3.240812329 |
| 62 | Kruppel-like factor 9 ( <i>KLF9</i> )                                                                  | 3.408182912 | 4.003078211 |
| 63 | MICAL-like 1 ( <i>MICAL1</i> )                                                                         | 2.757589995 | 4.808485675 |
| 64 | Monocyte to macrophage differentiation-associated ( <i>MMD</i> )                                       | 3.161148132 | 4.945639412 |
| 65 | Motile sperm domain containing 1 ( <i>MOSPD1</i> )                                                     | 2.808750295 | 3.337524136 |
| 66 | MSTP150 ( <i>MST150</i> )                                                                              | 2.593963977 | 2.593956831 |
| 67 | Muscleblind-like 2 ( <i>Drosophila</i> ) ( <i>MBNL2</i> )                                              | 4.476080688 | 5.310217705 |
| 68 | Neogenin homolog 1 (chicken) ( <i>NEO1</i> )                                                           | 2.476856454 | 2.681794982 |
| 69 | Neural precursor cell expressed, developmentally down-regulated 4-like ( <i>NEDD4L</i> )               | 2.556918985 | 3.75247555  |
| 70 | Nidogen 2 (osteonidogen) ( <i>NID2</i> )                                                               | 2.796979287 | 3.230120351 |
| 71 | Nuclear receptor coactivator 7 ( <i>NCOA7</i> )                                                        | 2.371514125 | 2.436608525 |
| 72 | Nudix (nucleoside diphosphate linked moiety X)-type motif 4 ( <i>NUDT4</i> )                           | 2.991027407 | 3.362924845 |
| 73 | Oligodendrocyte transcription factor 1 ( <i>OLIG1</i> )                                                | 2.822179162 | 6.740682544 |
| 74 | Optineurin ( <i>OPTN</i> )                                                                             | 3.246567573 | 7.741918775 |
| 75 | PDZK1 interacting protein 1 ( <i>PDZK1P1</i> )                                                         | 5.838845716 | 11.02727389 |
| 76 | Phospholipid scramblase 4 ( <i>PLSCR4</i> )                                                            | 3.100107165 | 5.856862638 |
| 77 | Progesterin and adipoQ receptor family member IX ( <i>PAQR9</i> )                                      | 3.807640125 | 7.150067767 |
| 78 | Proline rich Gla (G-carboxyglutamic acid) 4 (transmembrane) ( <i>PRRG4</i> )                           | 3.374160284 | 4.30318811  |
| 79 | RAB6B, member RAS oncogene family ( <i>RAB6B</i> )                                                     | 2.535763302 | 3.77261755  |
| 80 | Ras-like without CAAX 1 ( <i>RIT1</i> )                                                                | 2.534180806 | 2.265072235 |

|     | Gene                                                                                                               | Fold change |             |
|-----|--------------------------------------------------------------------------------------------------------------------|-------------|-------------|
|     |                                                                                                                    | PB vs CB+FL | PB vs FL    |
| 81  | Ring finger protein (C3H2C3 type) 6 ( <i>RNF6</i> )                                                                | 2.519394226 | 2.834726088 |
| 82  | Ring finger protein 213 ( <i>RNF213</i> )                                                                          | 2.398372023 | 2.509886633 |
| 83  | Scm-like with four mbt domains 2 ( <i>SFMBT2</i> )                                                                 | 2.894558285 | 2.545283006 |
| 84  | SCY1-like 2 ( <i>S. cerevisiae</i> ) ( <i>SCYL2</i> )                                                              | 2.491513617 | 3.074480026 |
| 85  | SEC14-like 1 ( <i>S. cerevisiae</i> ) ( <i>SEC14A1</i> )                                                           | 2.924001648 | 3.355409615 |
| 86  | SEC14-like 2 ( <i>S. cerevisiae</i> ) ( <i>SEC14L2</i> )                                                           | 2.566521509 | 2.408693143 |
| 87  | Similar to CG32820-PA, isoform A ( <i>LOC653071</i> )                                                              | 2.467109532 | 2.185568192 |
| 88  | SLIT-ROBO Rho GTPase activating protein 2 pseudogene 1( <i>SRGAP2P1</i> )                                          | 3.246159377 | 3.704836543 |
| 89  | Solute carrier family 22 (organic cation transporter), member 16 ( <i>SLC22A16</i> )                               | 2.863596669 | 9.112250157 |
| 90  | Solute carrier family 30 (zinc transporter), member 1 ( <i>SLC30A1</i> )                                           | 2.674524865 | 4.819601532 |
| 91  | Solute carrier family 7, (cationic amino acid transporter, y+ system) member 11 ( <i>SLC7A11</i> )                 | 3.498194845 | 4.7423717   |
| 92  | Stress 70 protein chaperone, microsomal-associated, 60kDa ( <i>STCH</i> )                                          | 3.043457333 | 2.937887473 |
| 93  | Thymic stromal lymphopoietin ( <i>TSLP</i> )                                                                       | 4.022564974 | 4.266251632 |
| 94  | Thyroid hormone receptor, beta (erythroblastic leukemia viral (v-erb-a) oncogene homolog 2, avian) ( <i>THRB</i> ) | 2.706445116 | 8.228057246 |
| 95  | Transferrin receptor (p90, CD71) ( <i>TFRC</i> )                                                                   | 3.153930531 | 5.447275579 |
| 96  | Tribbles homolog 3 ( <i>Drosophila</i> ) ( <i>TRIB3</i> )                                                          | 3.229472905 | 4.740963901 |
| 97  | Tripartite motif-containing 10 ( <i>TRIM10</i> )                                                                   | 2.597688815 | 5.049041674 |
| 98  | Tubulin, alpha 1a ( <i>TUBA1A</i> )                                                                                | 2.927181796 | 3.613938904 |
| 99  | Tubulin, gamma 2 ( <i>TUBG2</i> )                                                                                  | 3.357138272 | 7.044498648 |
| 100 | Tuftelin 1 ( <i>TUFT1</i> )                                                                                        | 4.166335948 | 5.159493126 |
| 101 | Ubiquitin specific peptidase 34 ( <i>USP34</i> )                                                                   | 2.513158144 | 2.812951051 |
| 102 | Vascular endothelial growth factor A ( <i>VEGFA</i> )                                                              | 2.889604144 | 4.377167706 |
| 103 | WWC family member 3 ( <i>WWC3</i> )                                                                                | 2.672864613 | 3.997286684 |

**Supplementary Table 2:** Down-regulated genes when (i) peripheral blood is compared to umbilical cord blood and fetal liver (PB vs CB+FL) and (ii) peripheral blood is compared to fetal liver (PB vs FL).

|    | Gene                                                                                                                                                                                     | Fold change |             |
|----|------------------------------------------------------------------------------------------------------------------------------------------------------------------------------------------|-------------|-------------|
|    |                                                                                                                                                                                          | PB vs CB+FL | PB vs FL    |
| 1  | Adenosine deaminase ( <i>ADA</i> )                                                                                                                                                       | 0.395281897 | 0.393152952 |
| 2  | Amphiregulin (schwannoma-derived growth factor) /// similar to Amphiregulin precursor (AR) (Colorectum cell-derived growth factor) ( <i>CRDGF</i> ) ( <i>AREG</i> /// <i>LOC727738</i> ) | 0.1157324   | 0.064626564 |
| 3  | Cat eye syndrome chromosome region, candidate 5 ( <i>CECR5</i> )                                                                                                                         | 0.337149036 | 0.261849844 |
| 4  | Cathepsin H ( <i>CTSH</i> )                                                                                                                                                              | 0.317014424 | 0.284292471 |
| 5  | CCAAT/enhancer binding protein (C/EBP), delta ( <i>CEBPD</i> )                                                                                                                           | 0.276370643 | 0.200782683 |
| 6  | Cell division cycle associated 7 ( <i>CDCA7</i> )                                                                                                                                        | 0.324578476 | 0.262878583 |
| 7  | Chromosome 10 open reading frame 58 ( <i>C10orf58</i> )                                                                                                                                  | 0.250114554 | 0.199360178 |
| 8  | Clone DNA57836 GLPG464 ( <i>UNQ464</i> )                                                                                                                                                 | 0.221398963 | 0.252663338 |
| 9  | Collagen, type IV, alpha 5 (Alport syndrome) ( <i>COL4A5</i> )                                                                                                                           | 0.189214953 | 0.167374241 |
| 10 | CXXC finger 6 ( <i>CXXC6</i> )                                                                                                                                                           | 0.137914589 | 0.096035936 |
| 11 | Cysteine-rich secretory protein 2 ( <i>CRISP2</i> )                                                                                                                                      | 0.211677919 | 0.159079366 |
| 12 | Estrogen-related receptor gamma ( <i>ESRRG</i> )                                                                                                                                         | 0.099543565 | 0.083323769 |
| 13 | Forkhead box D1 ( <i>FOXD1</i> )                                                                                                                                                         | 0.177940302 | 0.110259099 |
| 14 | GATA binding protein 5 ( <i>GATA5</i> )                                                                                                                                                  | 0.155648027 | 0.364965985 |
| 15 | Glucose phosphate isomerase ( <i>GPI</i> )                                                                                                                                               | 0.326384891 | 0.341577522 |
| 16 | Glycine amidinotransferase (L-arginine:glycine amidinotransferase) ( <i>GATM</i> )                                                                                                       | 0.172409813 | 0.118386675 |
| 17 | Guanine nucleotide binding protein (G protein), alpha inhibiting activity polypeptide 1 ( <i>GNAI1</i> )                                                                                 | 0.237385011 | 0.255466082 |
| 18 | H19, imprinted maternally expressed untranslated mRNA ( <i>H19</i> )                                                                                                                     | 0.046728474 | 0.027819461 |
| 19 | Hemoglobin, zeta ( <i>HBZ</i> )                                                                                                                                                          | 0.052191081 | 0.032028306 |
| 20 | Hexokinase 2 ( <i>HK2</i> )                                                                                                                                                              | 0.273909443 | 0.177934739 |
| 21 | Homo sapiens, clone IMAGE:5189615, mRNA                                                                                                                                                  | 0.199374192 | 0.375102244 |
| 22 | Hypermethylated in cancer 2 ( <i>HIC2</i> )                                                                                                                                              | 0.337638106 | 0.309972074 |
| 23 | Hypothetical protein LOC51252 ( <i>LOC51252</i> )                                                                                                                                        | 0.207826069 | 0.243203916 |

|    | Gene                                                                                                                               | Fold change |             |
|----|------------------------------------------------------------------------------------------------------------------------------------|-------------|-------------|
|    |                                                                                                                                    | PB vs CB+FL | PB vs FL    |
| 24 | Insulin-like growth factor binding protein 7 ( <i>IGFBP7</i> )                                                                     | 0.213889547 | 0.135574226 |
| 25 | Kelch-like 23 (Drosophila) ( <i>KLHL23</i> )                                                                                       | 0.318729134 | 0.248003805 |
| 26 | Kinase suppressor of ras 1 ( <i>KSRI</i> )                                                                                         | 0.151386942 | 0.10243736  |
| 27 | Lin-28 homolog B ( <i>C. elegans</i> ) ( <i>LIN28B</i> )                                                                           | 0.034141802 | 0.017967316 |
| 28 | Lysosomal associated protein transmembrane 4 beta ( <i>LAPTM4B</i> )                                                               | 0.259147404 | 0.191860343 |
| 29 | Lysozyme (renal amyloidosis) ( <i>LYZ</i> )                                                                                        | 0.117876616 | 0.065114873 |
| 30 | Myeloperoxidase ( <i>MPO</i> )                                                                                                     | 0.058082297 | 0.039551912 |
| 31 | Myocyte enhancer factor 2C ( <i>MEF2C</i> )                                                                                        | 0.375143164 | 0.289609144 |
| 32 | Myo-inositol 1-phosphate synthase A1 ( <i>ISYNA1</i> )                                                                             | 0.255979408 | 0.180255561 |
| 33 | Neurofilament, heavy polypeptide 200kDa ( <i>NEFH</i> )                                                                            | 0.178112476 | 0.181318527 |
| 34 | Paroxysmal nonkinesigenic dyskinesia ( <i>PNKD</i> )                                                                               | 0.160342134 | 0.148617    |
| 35 | Phospholipid transfer protein ( <i>PLTP</i> )                                                                                      | 0.251521644 | 0.217698982 |
| 36 | Prostaglandin E receptor 3 (subtype EP3) ( <i>PTGER3</i> )                                                                         | 0.169488446 | 0.109321197 |
| 37 | Protein kinase D3 ( <i>PRKD3</i> )                                                                                                 | 0.169890314 | 0.21144358  |
| 38 | Protein phosphatase 1, regulatory (inhibitor) subunit 3C ( <i>PPP1R3C</i> )                                                        | 0.151233014 | 0.091320948 |
| 39 | Ribonuclease T2 ( <i>RNASET2</i> )                                                                                                 | 0.320412286 | 0.243865939 |
| 40 | Roundabout, axon guidance receptor, homolog 1 (Drosophila) ( <i>ROBO1</i> )                                                        | 0.164244223 | 0.128566225 |
| 41 | Sema domain, immunoglobulin domain (Ig), transmembrane domain (TM) and short cytoplasmic domain, (semaphorin) 4C ( <i>SEMA4C</i> ) | 0.348320336 | 0.345862429 |
| 42 | Sorbitol dehydrogenase ( <i>SORD</i> )                                                                                             | 0.222819425 | 0.247597621 |
| 43 | TIMP metalloproteinase inhibitor 3 (Sorsby fundus dystrophy, pseudoinflammatory) ( <i>TIMP3</i> )                                  | 0.246533176 | 0.200699425 |
| 44 | Tribbles homolog 2 (Drosophila) ( <i>TRIB2</i> )                                                                                   | 0.213758187 | 0.256114274 |
| 45 | Tripartite motif-containing 6 ( <i>TRIM6</i> )                                                                                     | 0.286319953 | 0.263724872 |
| 46 | TSPY-like 5 ( <i>TSPYL5</i> )                                                                                                      | 0.278689444 | 0.192915013 |
| 47 | Tubulin, beta 1 ( <i>TUBB1</i> )                                                                                                   | 0.240015322 | 0.232022434 |
| 48 | Von Willebrand factor C and EGF domains ( <i>VWCE</i> )                                                                            | 0.282196072 | 0.196505457 |
| 49 | Wingless-type MMTV integration site family, member 5B ( <i>WNT5B</i> )                                                             | 0.129656711 | 0.274701149 |
| 50 | Zinc finger CCCH-type, antiviral 1-like ( <i>ZC3HAVIL</i> )                                                                        | 0.326617199 | 0.241993625 |

**Supplementary Table 3.** Statistical and Hardy-Weinberg analyses on the genotyping data of  $\beta$ -type hemoglobinopathies patients of Hellenic origin and healthy (non-thalassemic) individuals.

| <b>Study population</b>                                     | <b>rs3024997 (G&gt;A)</b>                 | <b>rs2146323 (C&gt;A)</b> | <b>rs2146323 (C&gt;A)</b> |
|-------------------------------------------------------------|-------------------------------------------|---------------------------|---------------------------|
|                                                             | <b>Statistical analysis (p-values)</b>    |                           |                           |
| Healthy individuals vs. $\beta$ -thalassemia major patients | 0.199                                     | 0.03                      | PA=0.748; PB=0.735        |
|                                                             | <b>Hardy-Weinberg analysis (p-values)</b> |                           |                           |
|                                                             | Controls                                  | Controls                  | Controls                  |
|                                                             | 0.397952 (Pearson)                        | 0.105127 (Pearson)        | 0.707405 (Pearson)        |
|                                                             | 0.398091 (Llr)                            | 0.115340 (Llr)            | 0.707247 (Llr)            |
|                                                             | 0.418000 (Exact)                          | 0.107909 (Exact)          | 0.839094 (Exact)          |
|                                                             | Cases                                     | Cases                     | Cases                     |
|                                                             | 0.085948 (Pearson)                        | 0.050670 (Pearson)        | p=0.505677 (Pearson)      |
|                                                             | 0.084735 (Llr)                            | <b>0.038290 (Llr)</b>     | p=0.505778 (Llr)          |
|                                                             | 0.108678 (Exact)                          | 0.069013 (Exact)          | p=0.543615 (Exact)        |
|                                                             | <b>Statistical analysis (p-values)</b>    |                           |                           |
| Healthy individuals vs. NTDT patients                       | 0.005                                     | 0.0005                    | 0.896                     |
|                                                             | <b>Hardy-Weinberg analysis (p-values)</b> |                           |                           |
|                                                             | Controls                                  | Controls                  | Controls                  |
|                                                             | 0.397952 (Pearson)                        | 0.105127 (Pearson)        | 0.707405 (Pearson)        |
|                                                             | 0.398091 (Llr)                            | 0.115340 (Llr)            | 0.707247 (Llr)            |
|                                                             | 0.418000 (Exact)                          | 0.107909 (Exact)          | 0.839094 (Exact)          |
|                                                             | Cases                                     | Cases                     | Cases                     |
|                                                             | 0.193795 (Pearson)                        | 0.076785 (Pearson)        | 0.948642 (Pearson)        |
|                                                             | 0.183849 (Llr)                            | 0.073850 (Llr)            | 0.948640 (Llr)            |
|                                                             | 0.237330 (Exact)                          | 0.095905 (Exact)          | 1.000000 (Exact)          |
|                                                             | <b>Statistical analysis (p-values)</b>    |                           |                           |
| $\beta$ -Thalassemia major patients vs. NTDT patients       | 0.003                                     | 0.009                     | 0.823                     |
|                                                             | <b>Hardy-Weinberg analysis (p-values)</b> |                           |                           |
|                                                             | Controls                                  | Controls                  | Controls                  |
|                                                             | 0.085948 (Pearson)                        | 0.050670 (Pearson)        | 0.505677 (Pearson)        |
|                                                             | 0.084735 (Llr)                            | <b>0.038290 (Llr)</b>     | 0.505778 (Llr)            |
|                                                             | 0.108678 (Exact)                          | 0.069013 (Exact)          | 0.543615 (Exact)          |
|                                                             | Cases                                     | Cases                     | Cases                     |
|                                                             | 0.193795 (Pearson)                        | 0.076785 (Pearson)        | 0.948642 (Pearson)        |
|                                                             | 0.183849 (Llr)                            | 0.073850 (Llr)            | 0.948640 (Llr)            |
|                                                             | 0.237330 (Exact)                          | 0.095905 (Exact)          | 1.000000 (Exact)          |
|                                                             | <b>Statistical analysis (p-values)</b>    |                           |                           |
| HU responders vs. HU non-responders                         | 0.337                                     | 0.0002                    | PA=0.932; PB=0.917        |
|                                                             | <b>Hardy-Weinberg analysis (p-values)</b> |                           |                           |
|                                                             | Controls                                  | Controls                  | Controls                  |
|                                                             | 0.085948 (Pearson)                        | 0.519504 (Pearson)        | p=0.689157 (Pearson)      |
|                                                             | 0.084735 (Llr)                            | 0.517052 (Llr)            | p=0.689117 (Llr)          |
|                                                             | 0.108678 (Exact)                          | 0.656613 (Exact)          | p=0.691924 (Exact)        |
|                                                             | Cases                                     | Cases                     | Cases                     |
|                                                             | 0.233238 (Pearson)                        | 8.374e-07 (Pearson)       | p=0.432303 (Pearson)      |
|                                                             | 0.230303 (Llr)                            | 1.857e-06 (Llr)           | p=0.432102 (Llr)          |
|                                                             | 0.293727 (Exact)                          | 2.134e-06 (Exact)         | p=0.428313 (Exact)        |



(Pearson): Pearson's goodness-of-fit chi-square (degree of freedom=1); (Llr): Log likelihood ratio chi-square (degree of freedom=1); (Exact): Exact test PA, PB: two-tailed p-values; if P, then PA=PB. Data shown in red correspond to significant p-values (p-values < 0.05) for the statistical test noted in the parentheses.

**Supplementary Table 4.** Pair-wise linkage disequilibrium (LD) calculations for the tagSNPs of interest across the *VEGFA* gene (CEU).

| <b>D'</b>                 | <b>rs3024997 (G&gt;A)</b> | <b>rs2146323 (C&gt;A)</b> | <b>rs10434 (A&gt;G)</b> |
|---------------------------|---------------------------|---------------------------|-------------------------|
| <b>rs3024997 (G&gt;A)</b> | 1.0                       | 1.0                       | 0.009                   |
| <b>rs2146323 (C&gt;A)</b> | 1.0                       | 1.0                       | 0.349                   |
| <b>rs10434 (A&gt;G)</b>   | 0.009                     | 0.349                     | 1.0                     |
| <b>R<sup>2</sup></b>      | <b>rs3024997 (G&gt;A)</b> | <b>rs2146323 (C&gt;A)</b> | <b>rs10434 (A&gt;G)</b> |
| <b>rs3024997 (G&gt;A)</b> | 1.0                       | 0.244                     | 0.0                     |
| <b>rs2146323 (C&gt;A)</b> | 0.244                     | 1.0                       | 0.044                   |
| <b>rs10434 (A&gt;G)</b>   | 0.0                       | 0.044                     | 1.0                     |

## Supplementary Figures

### Supplementary Figure 1.

**Differential gene expression when adult peripheral blood is compared to cord blood.** A total of 135 genes were over- (FC >2) or down-regulated (FC <2). Columns represent samples; rows are genes. Red, genes that were up-regulated; green, genes that were down-regulated.

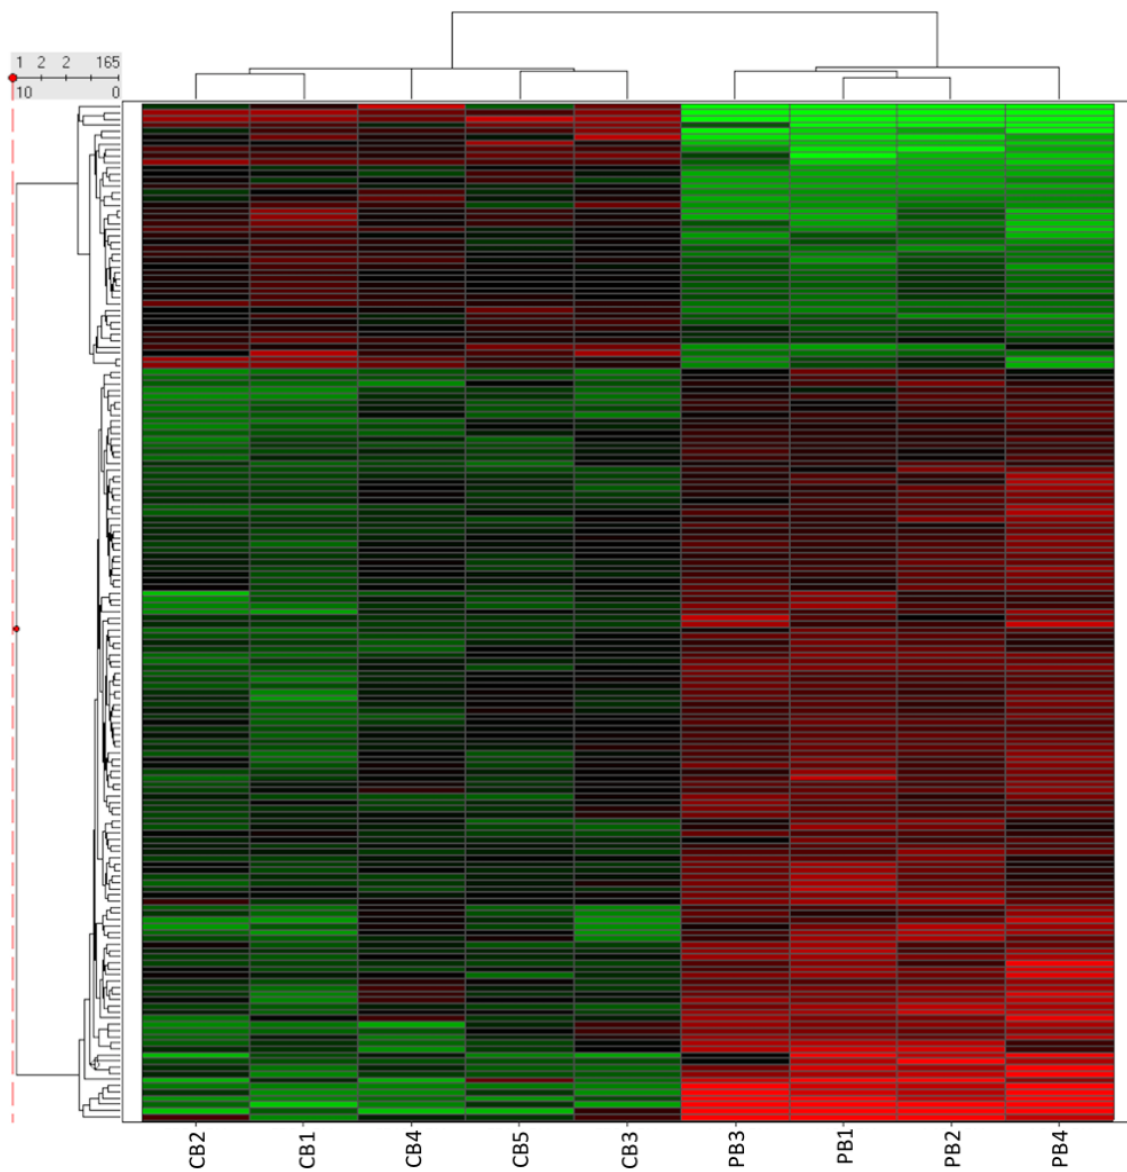

## Supplementary Figure 2.

**Differential gene expression when adult peripheral blood is compared to fetal liver.** A total of 962 genes were over- (FC >2) or down-regulated (FC <2). Columns represent samples; rows are genes. Red, genes that were up-regulated; green, genes that were down-regulated.

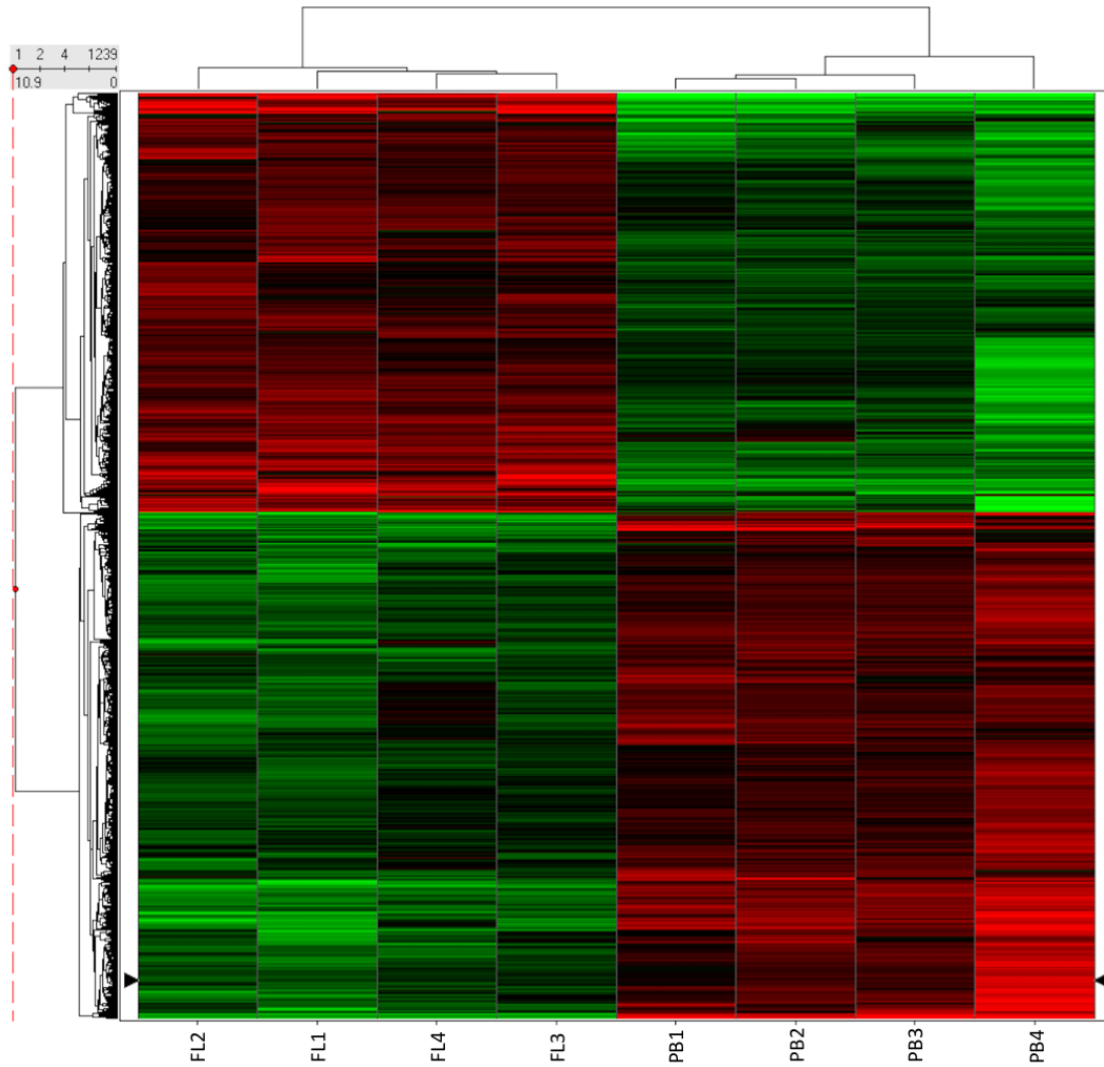

Supplement: 40246_2017_120_MOESM1_ESM.pdf [file 40246_2017_120_MOESM1_ESM.pdf]
